# Supplementary material for: Iridium-(κ2-NSi) catalyzed dehydrogenation of formic acid: effect of auxiliary ligands on the catalytic performance
Source: Royal Society of Chemistry journal article supplement (doi:10.1039/d3dt00744h), 2023-01-01
Supplement: d3dt00744h1.pdf [file d3dt00744h1.pdf]

## Supporting Information

# Iridium-( $\kappa^2$ -NSi) Catalyzed Dehydrogenation of Formic Acid: Effect of Auxiliary Ligands on the Catalytic Performance

*Alejandra Gómez-España,<sup>a,b</sup> Jorge L. Lopez-Morales,<sup>a</sup> Belinda Español,<sup>a</sup> Pilar  
García-Orduña,<sup>a</sup> Manuel Iglesias,<sup>a</sup> and Francisco J. Fernández-Alvarez<sup>\*,a</sup>*

*<sup>a</sup>Departamento de Química Inorgánica-Instituto de Síntesis Química y Catálisis  
Homogénea (ISQCH), Universidad de Zaragoza–CSIC, Facultad de Ciencias, 50009  
Zaragoza, Spain, e-mail, F. J. Fernández-Alvarez: paco@unizar.es*

*<sup>b</sup>Universidad Pedagógica Nacional Francisco Morazán (UPNFM)- Colonia el Dorado,  
Frente a Plaza Miraflores, Tegucigalpa-Honduras.*

# 1. Experimental Details

## 1. 1. Selected spectra of complexes 2 y 3

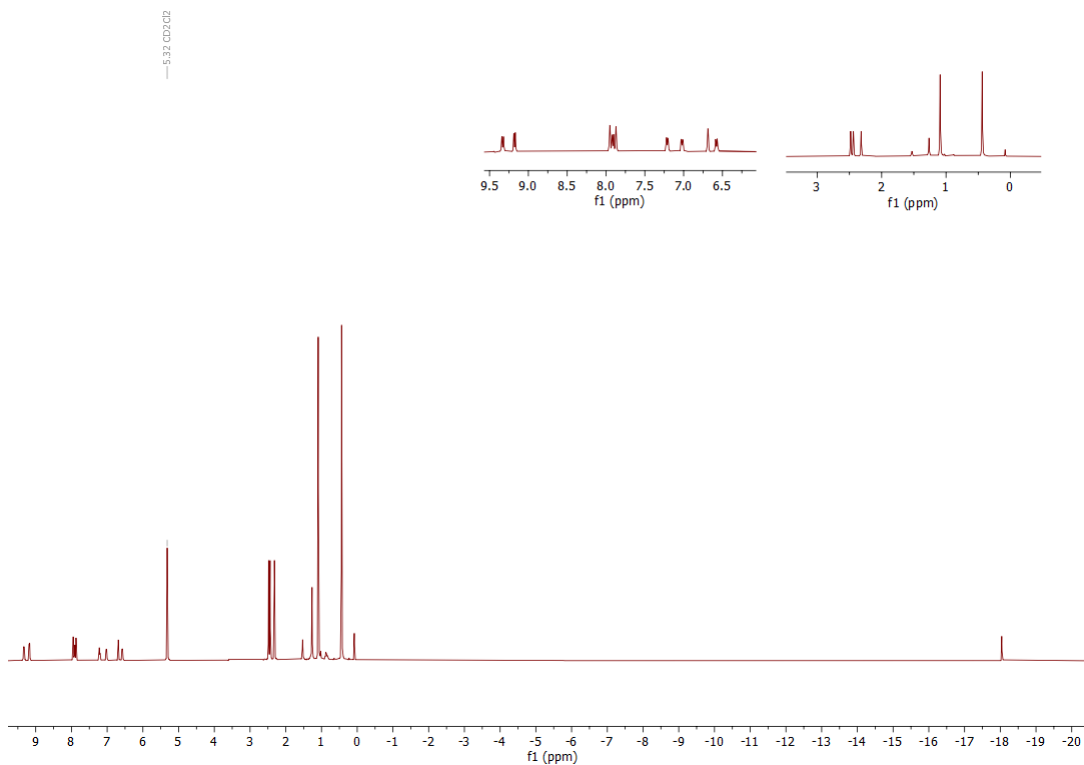

**Figure S1.**  $^1\text{H}$  NMR spectrum of **2** in  $\text{CD}_2\text{Cl}_2$  (300 MHz, 298K).

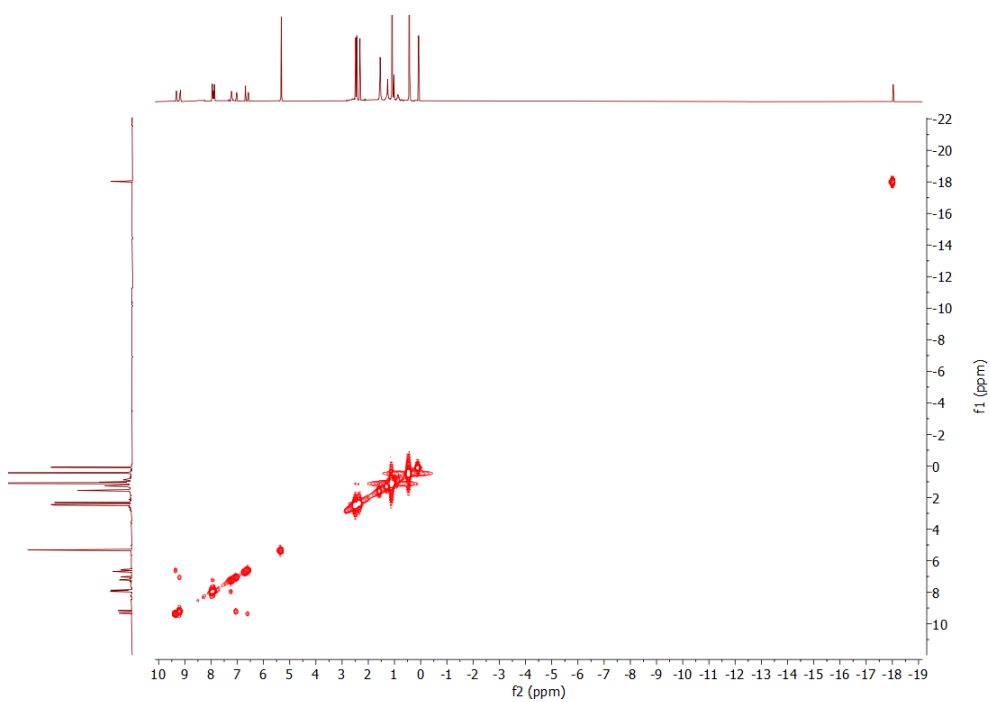

**Figure S2.**  $^1\text{H}$ - $^1\text{H}$  COSY NMR spectrum of **2** in  $\text{CD}_2\text{Cl}_2$  (300 MHz, 298K).

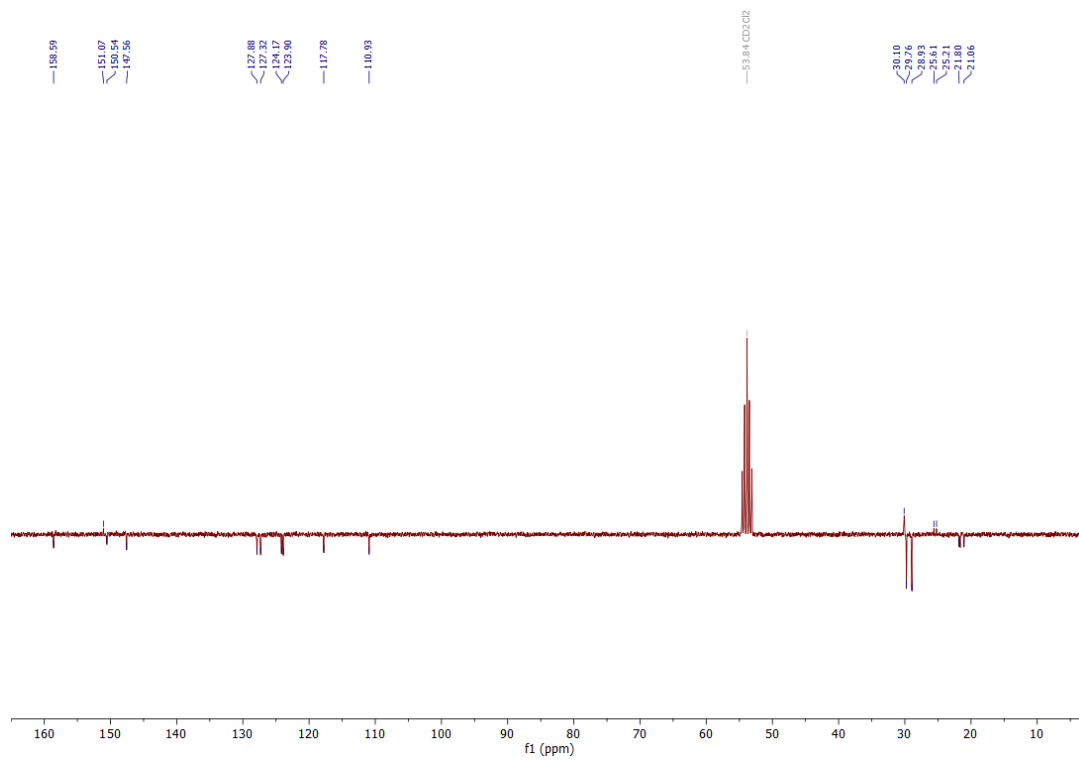

**Figure S3.**  $^{13}\text{C}$  APT NMR spectrum of **2** in  $\text{CD}_2\text{Cl}_2$  (75 MHz, 298K).

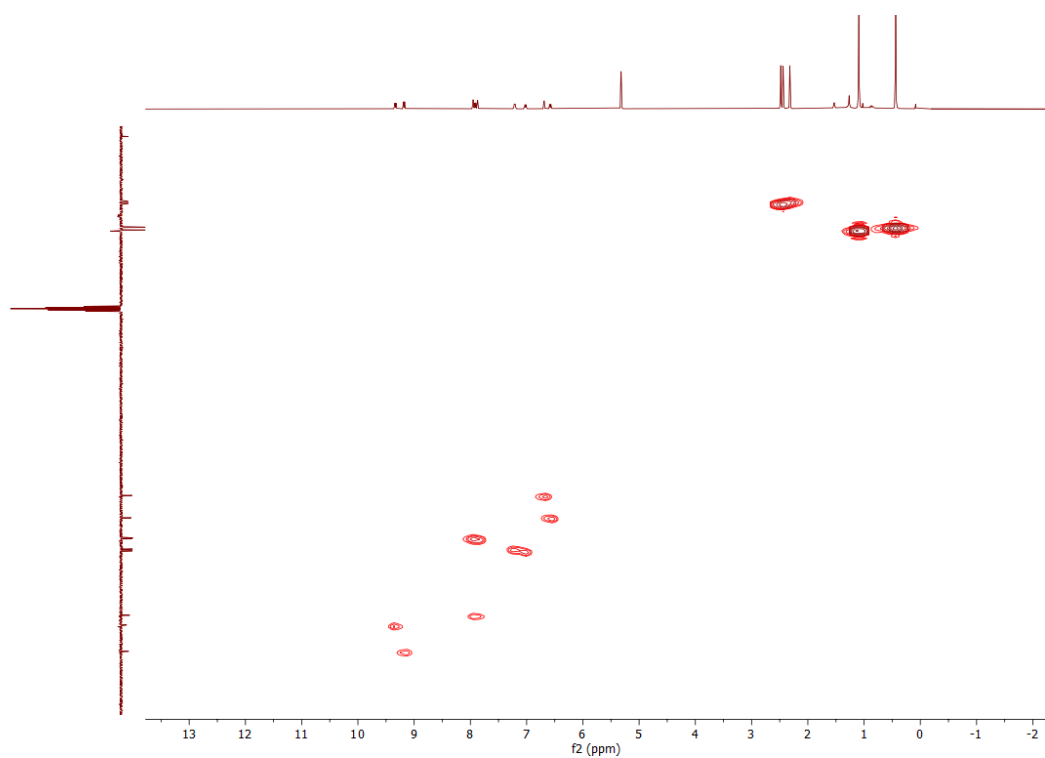

**Figure S4.**  $^1\text{H}$ - $^{13}\text{C}$  HSQC NMR spectrum of **2** in  $\text{CD}_2\text{Cl}_2$  (298K).

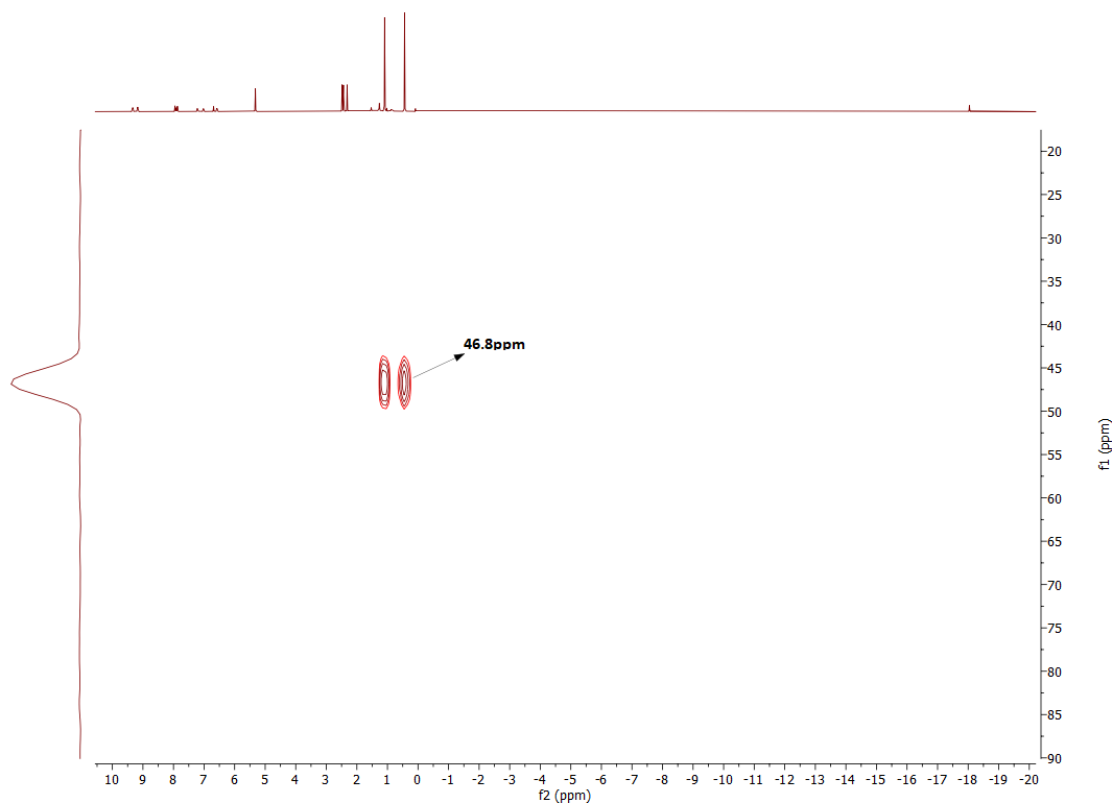

**Figure S5.**  $^1\text{H}$ - $^{29}\text{Si}$  HMBC spectrum of **2** in  $\text{CD}_2\text{Cl}_2$  (60 MHz, 298K).

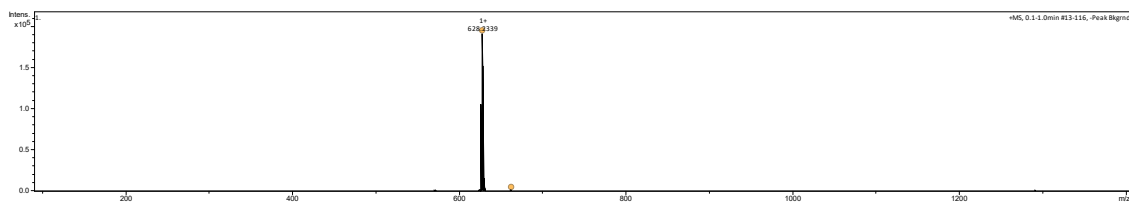

**Figure S6.** HR-MS of complex **2**.

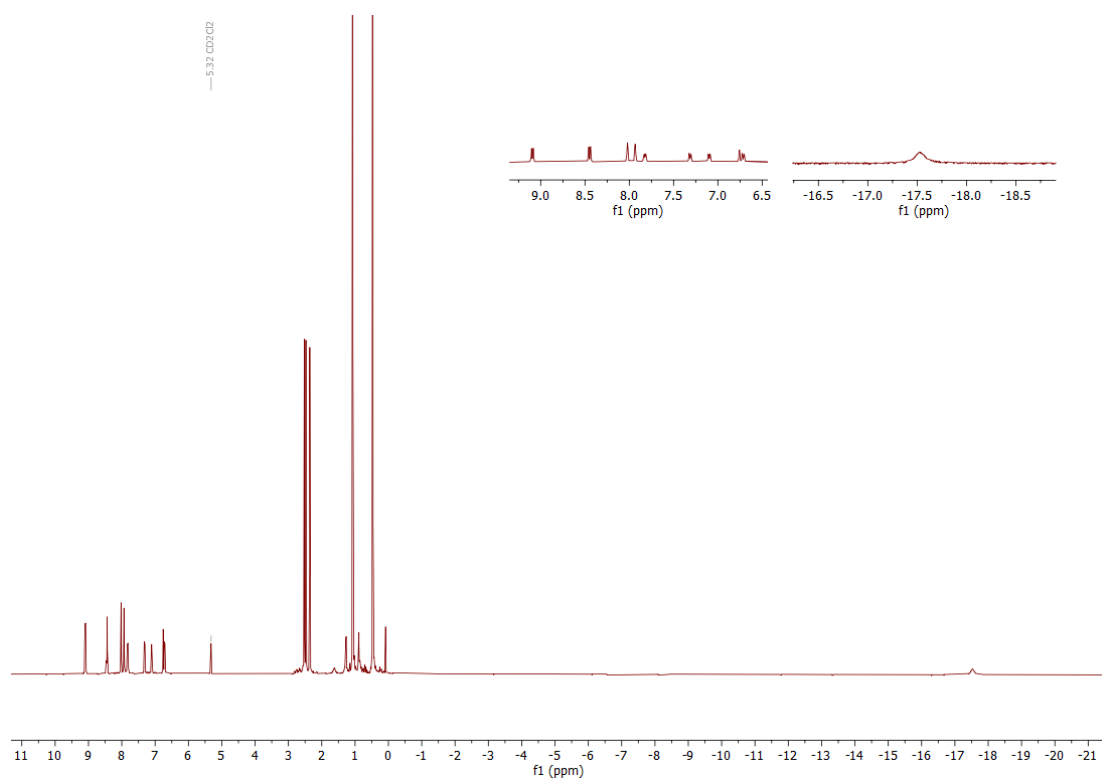

**Figure S7.** <sup>1</sup>H NMR spectrum of **3** in CD<sub>2</sub>Cl<sub>2</sub> (300 MHz, 298K).

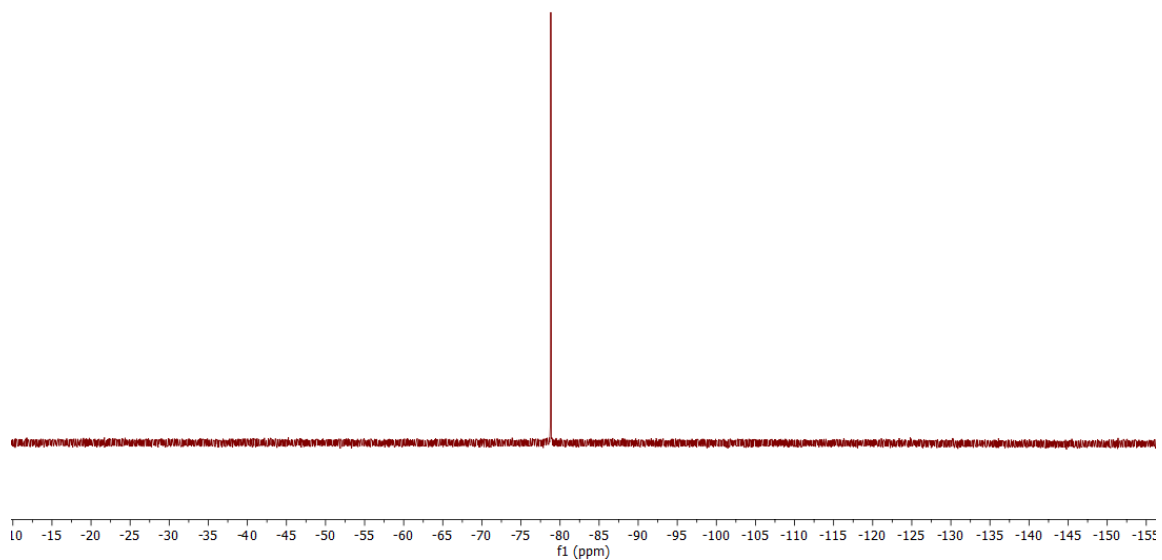

**Figure S8.**  $^{19}\text{F}\{^1\text{H}\}$  NMR spectrum of **3** in  $\text{CD}_2\text{Cl}_2$  (282 MHz, 298K)

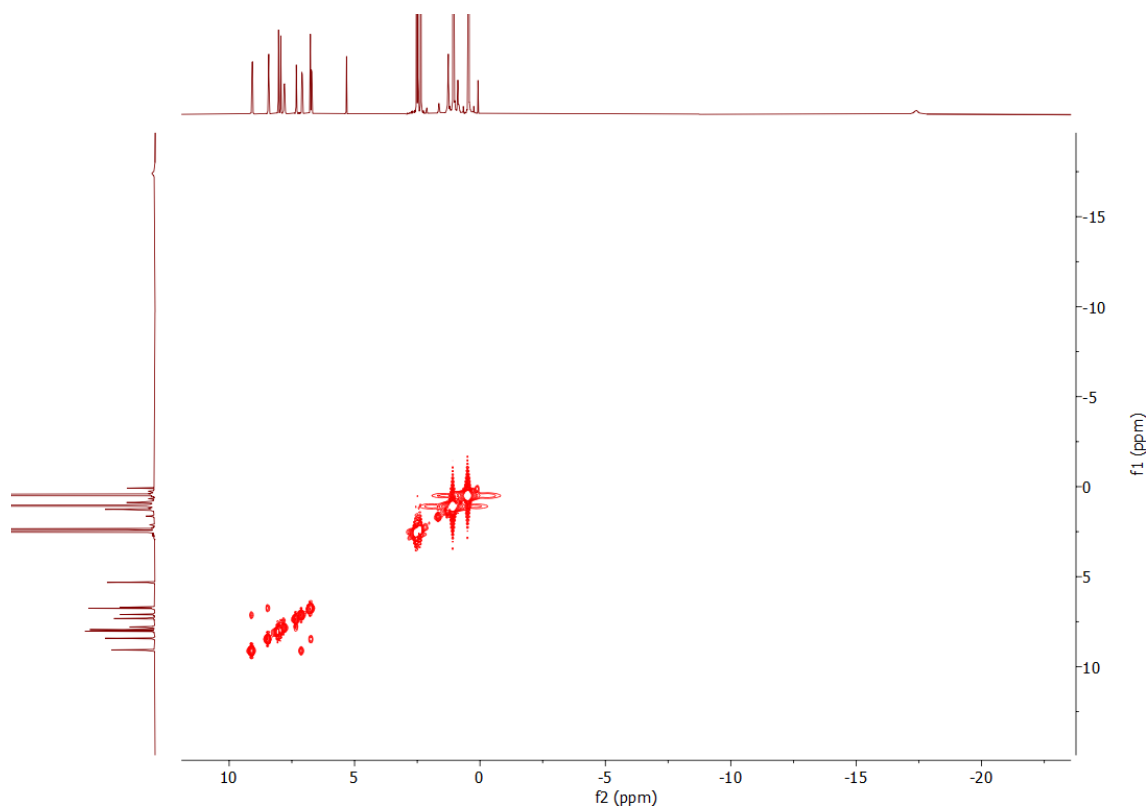

**Figure S9.**  $^1\text{H}\text{-}^1\text{H}$  COSY NMR spectrum of **3** in  $\text{CD}_2\text{Cl}_2$  (300 MHz, 298K).

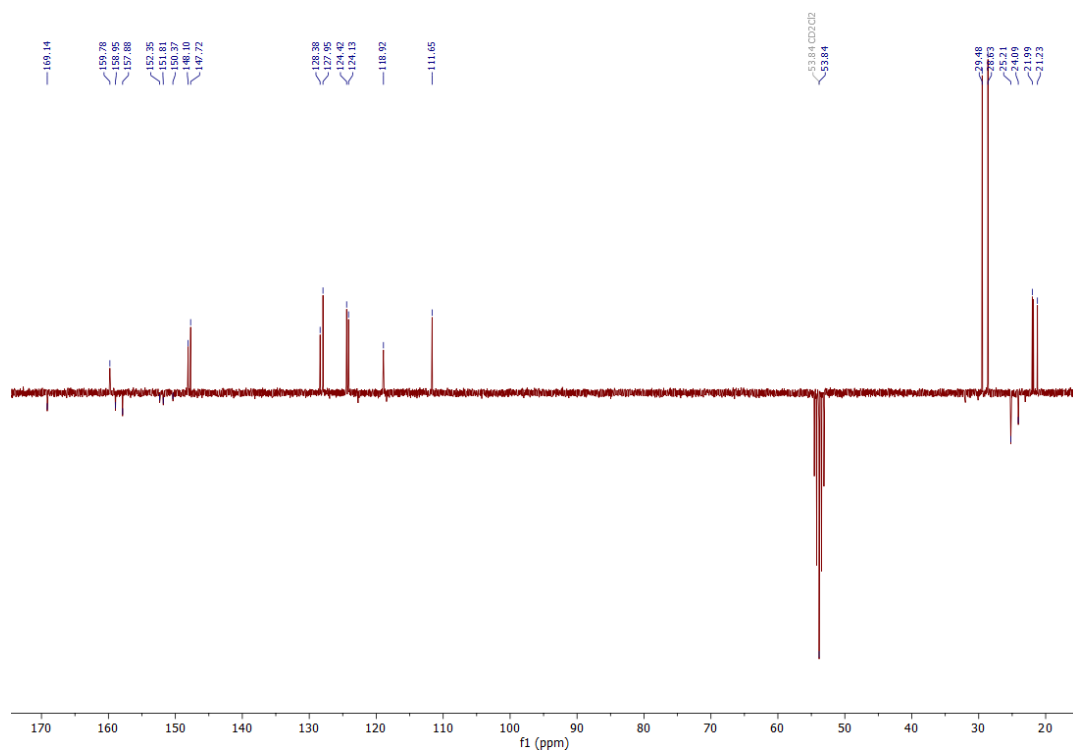

**Figure S10.**  $^{13}\text{C}$  APT NMR spectrum of **3** in  $\text{CD}_2\text{Cl}_2$  (75 MHz, 298K).

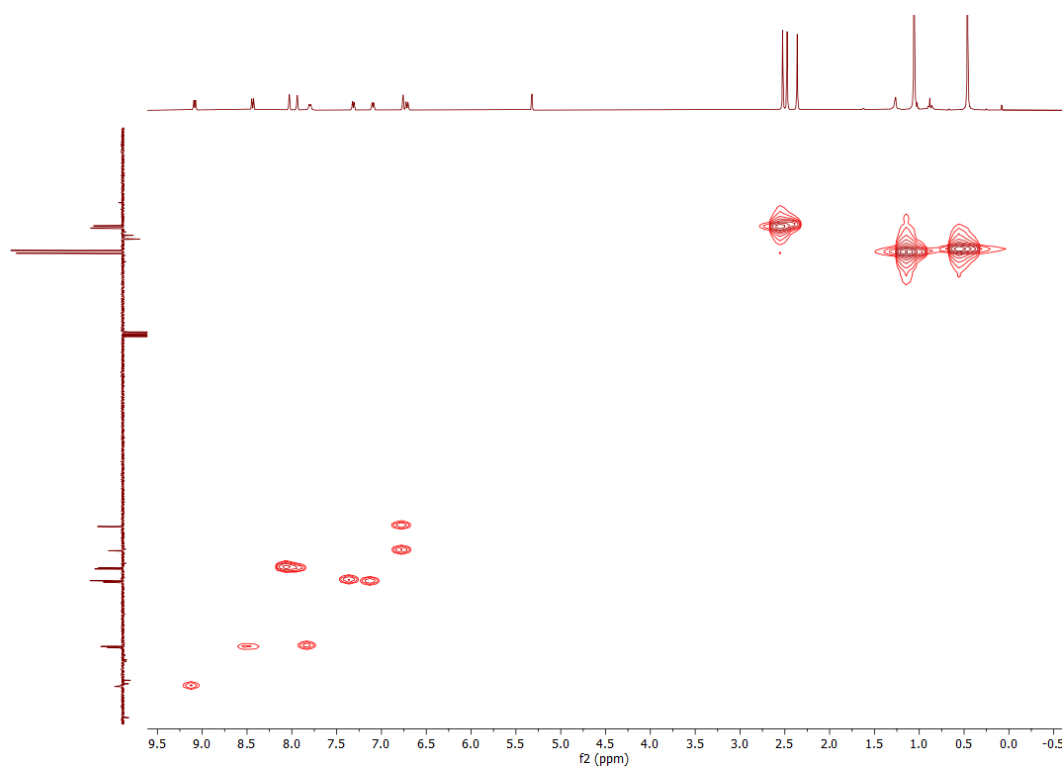

**Figure S11.**  $^1\text{H}$ - $^{13}\text{C}$  HSQC NMR spectrum of **3** in  $\text{CD}_2\text{Cl}_2$  (298K).

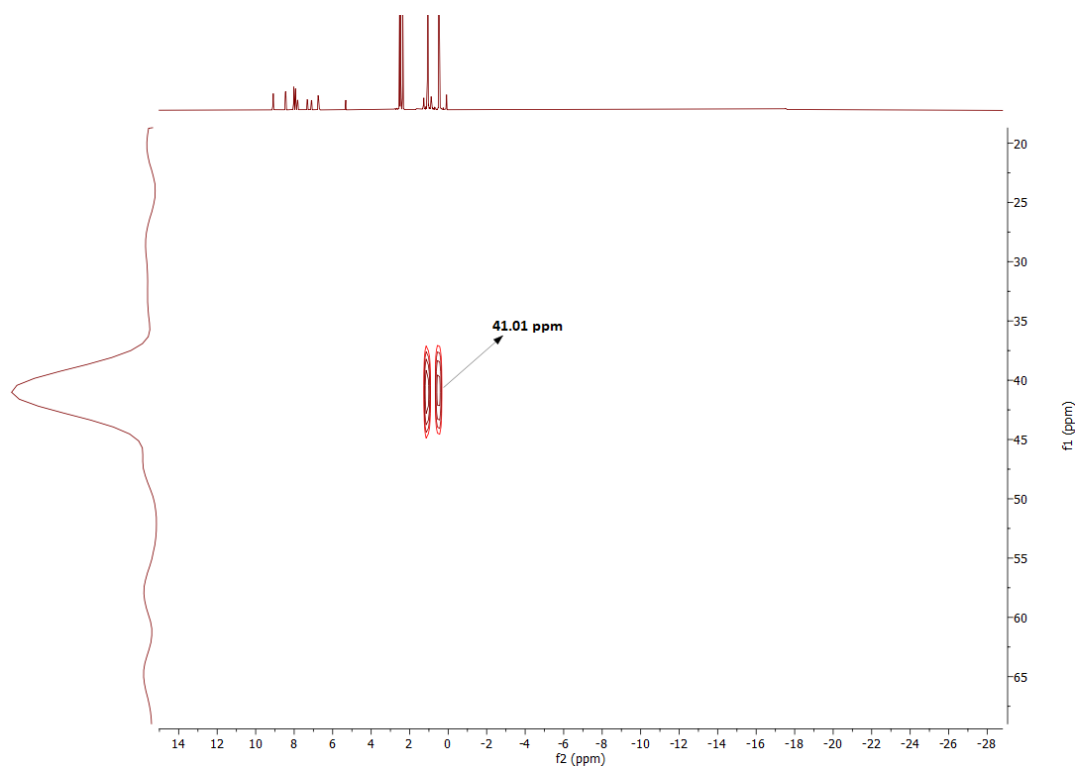

**Figure S12.**  $^1\text{H}$ - $^{29}\text{Si}$  HMBC spectrum of **3** in  $\text{CD}_2\text{Cl}_2$  (60 MHz, 298K).

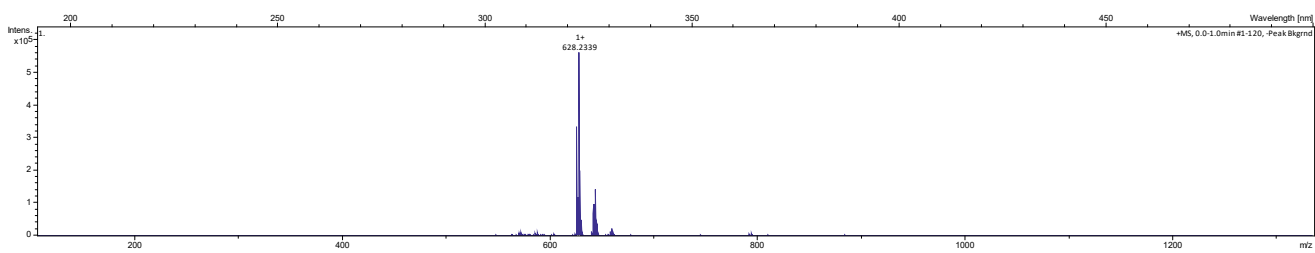

**Figure S13.** HR-MS of complex **3**.



## 2. TON and TOF determination

H<sub>2</sub> pressure: 
$$P_{H_2} = \frac{P_{measured}}{2}$$

Amount of H<sub>2</sub> formed calculated with the Ideal Gas Law: 
$$n_{H_2} = \frac{P_{H_2}V}{RT}$$

Total Volume = 0.0162 L; R constant = 0.08205 atm L mol<sup>-1</sup> K<sup>-1</sup>

$$TON = \frac{n_{H_2}}{n_{cat}}$$

$$TOF = \frac{TON}{t}$$

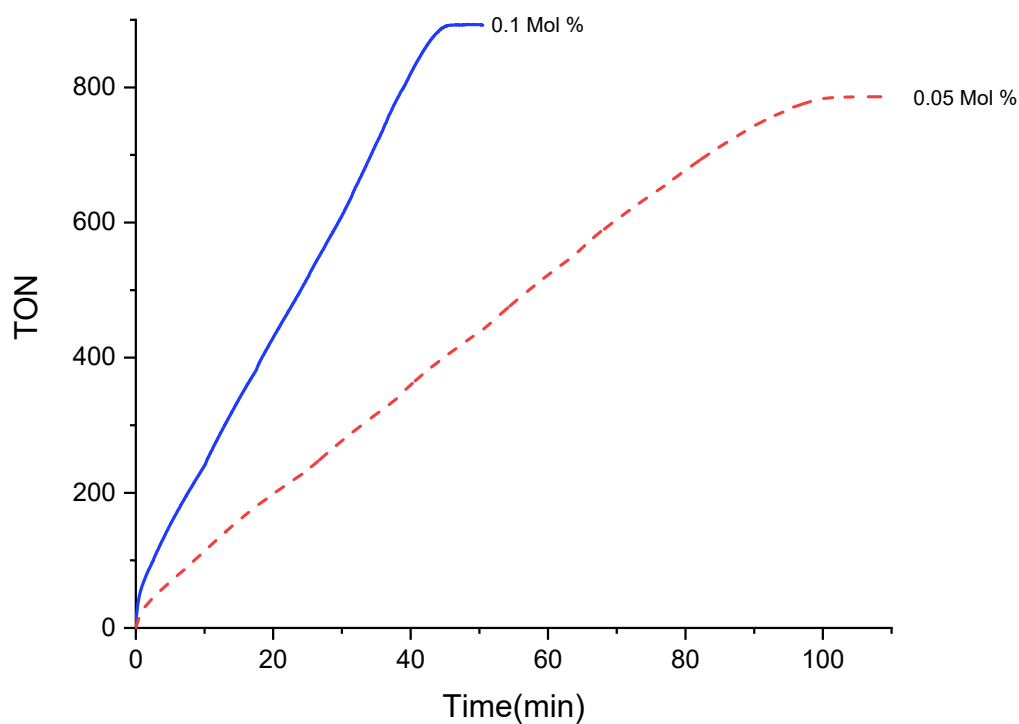

**Figure S14.** TON vs time representation of the **3**-catalyzed (0.1 and 0.05 mol%) FA solvent-less dehydrogenation with NEt<sub>3</sub> (40 mol %) at 353 K

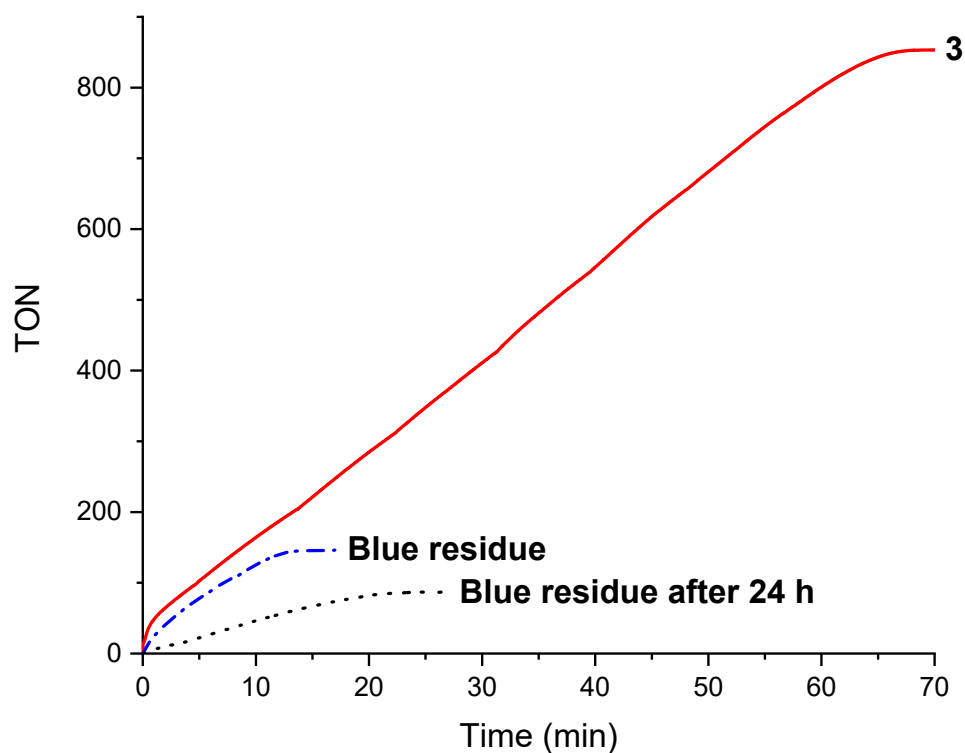

**Figure S15.** TON vs time (min) from the **3**-catalyzed (0.1 mol %) in presence of Et<sub>3</sub>N (40 mol %) and the blue-residue catalyzed solventless dehydrogenation of HCOOH at 353 K until 24 hours later.

| Entry    | Temperature (K) | TOF (5 min) |
|----------|-----------------|-------------|
| <b>1</b> | <b>323</b>      | 86          |
| <b>2</b> | <b>333</b>      | 205         |
| <b>3</b> | <b>343</b>      | 778         |
| <b>4</b> | <b>353</b>      | 1210        |
| <b>5</b> | <b>363</b>      | 1500        |
| <b>6</b> | <b>373</b>      | 3260        |

**Table S16.** TOF<sub>5min</sub> for the **3**-catalyzed (0.1 mol%) FA solvent-less dehydrogenation with NEt<sub>3</sub> (40 mol %) from 323 K to 373 K.

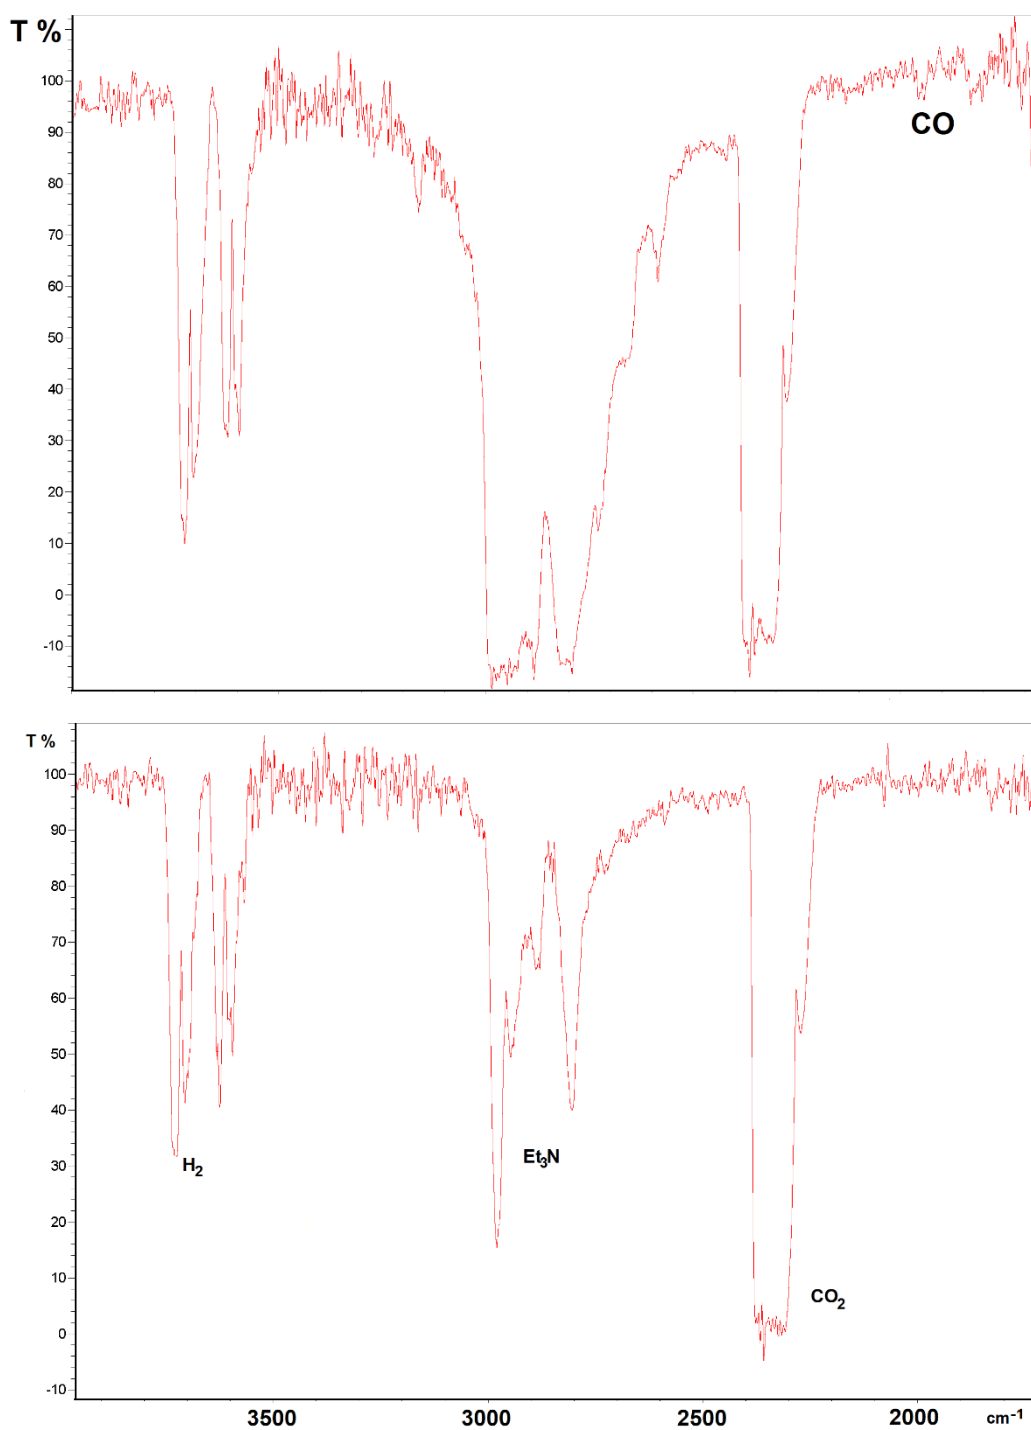

**Figure S17.** FT-IR spectrum of the gaseous product from the catalytic reaction. Up: reaction at 373 K. Down: reaction at 353 K.

### 3. NMR study of the blue residue from the catalytic reactions

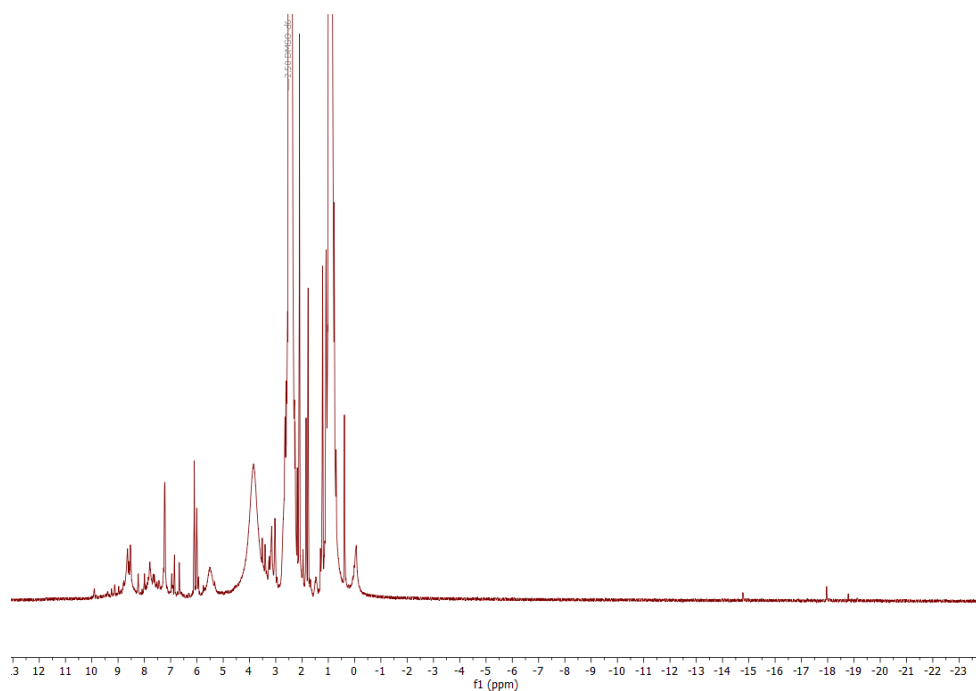

**Figure S18.**  $^1\text{H}$  NMR spectrum of the blue-residue from the solvent-free FA dehydrogenation using **3** in DMSO (400 MHz, 298K).

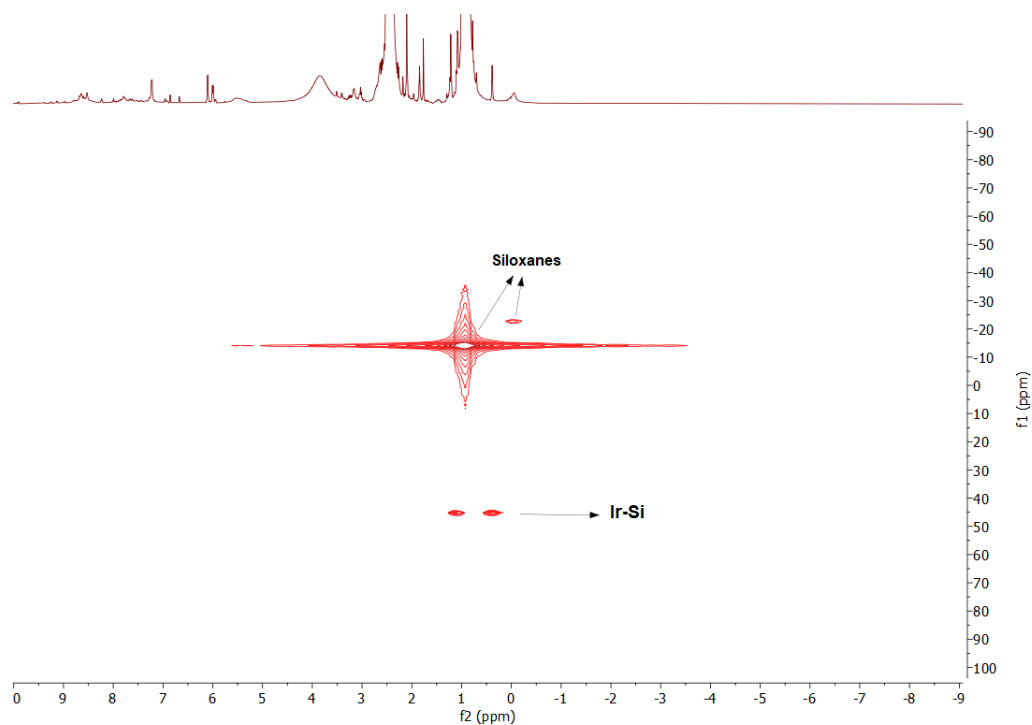

**Figure S19.**  $^1\text{H}$ - $^{29}\text{Si}$  HMBC spectrum of the blue-residue from the solvent-free FA dehydrogenation using **3** in DMSO (400 MHz, 298K).
